# Supplementary material for: Elucidating the mechanism of nucleation inhibition of pathology crystallization of gout based on the evidence from amorphous form and in solution
Source: Royal Society of Chemistry journal article supplement (doi:10.1039/d2ra03289a), 2022-01-01
Supplement: d2ra03289a1.pdf [file d2ra03289a1.pdf]

## Supporting Information

### **Elucidating the Mechanism of Nucleation Inhibition of Pathology Crystallization of Gout based on the evidence from Amorphous Form and in Solution**

*Dan Zhou<sup>#</sup>, Shiqi Jiao, Pengfei Zhang<sup>#</sup>, Yige Jin, Yonglan Pan, Chunyan Ou, Xingde Zhang, Tingming Fu, and Yonghai Liu\**

School of Pharmacy, Nanjing University of Chinese Medicine, Nanjing 210046, China

[liuyh@njucm.edu.cn](mailto:liuyh@njucm.edu.cn)

## Experimental

**Materials.** Uric acid (>99%), xanthine (>99%) were obtained from Sigma Aldrich and used without purification. Aqueous solutions were prepared using deionized water (18.2 M $\Omega$ ) purified with a Nanjing Yipuyida purification system.

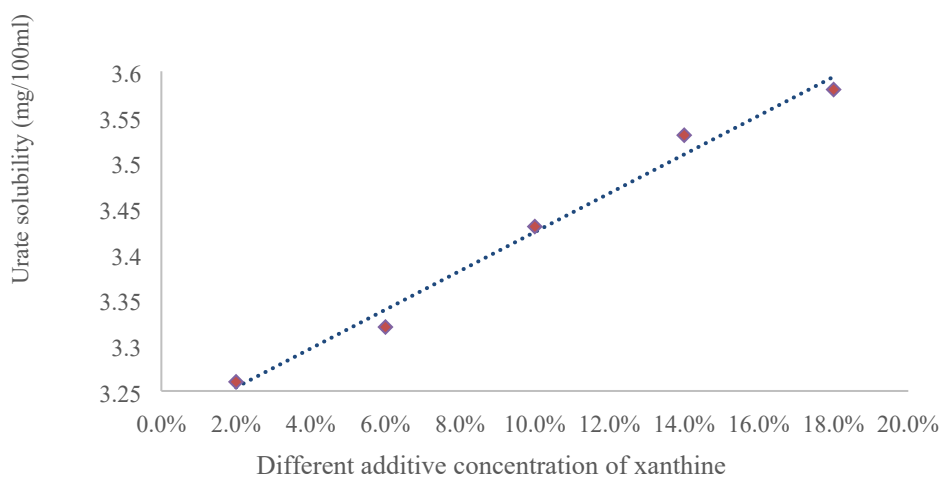

**Fig S1** Influence of xanthine in different added concentration on solubilities of MSUM at 15 °C (pH = 7.4) in the presence of 8mM MSUM and 150mM NaCl, with a typical standard deviation of 0.015 mg/100g of H<sub>2</sub>O.

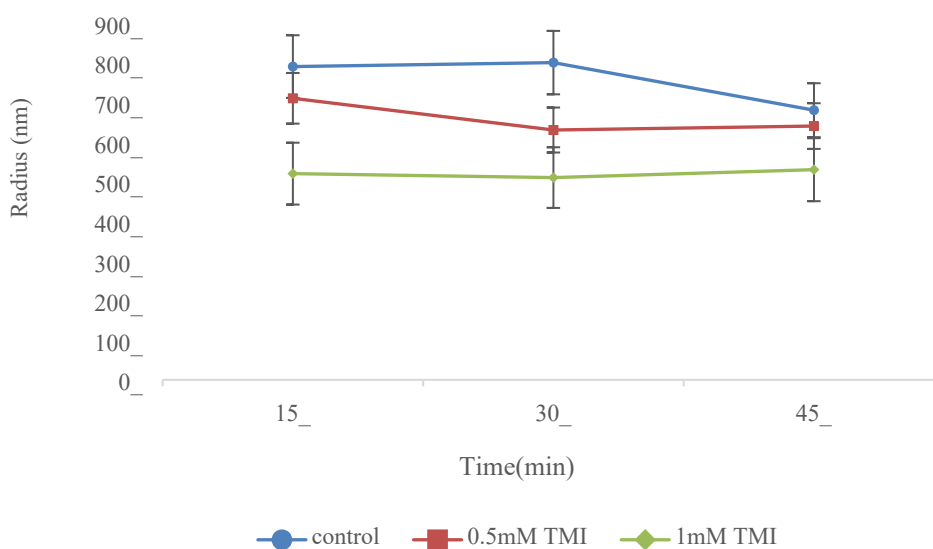

**Fig. S2.** Dynamic light scattering experiments were measured at 37 °C (pH = 7.4) in 10 mM MSUM solution in the presence of 150 mM NaCl and used as control samples. And the measurements were performed at a solution in the presence of 150 mM NaCl, 10mM MSUM and 0.5 or 1mM xanthine (at 37 °C; pH = 7.4). Data are the average of more than three measurements using separately prepared samples. Error bars equal 2 standard deviation.

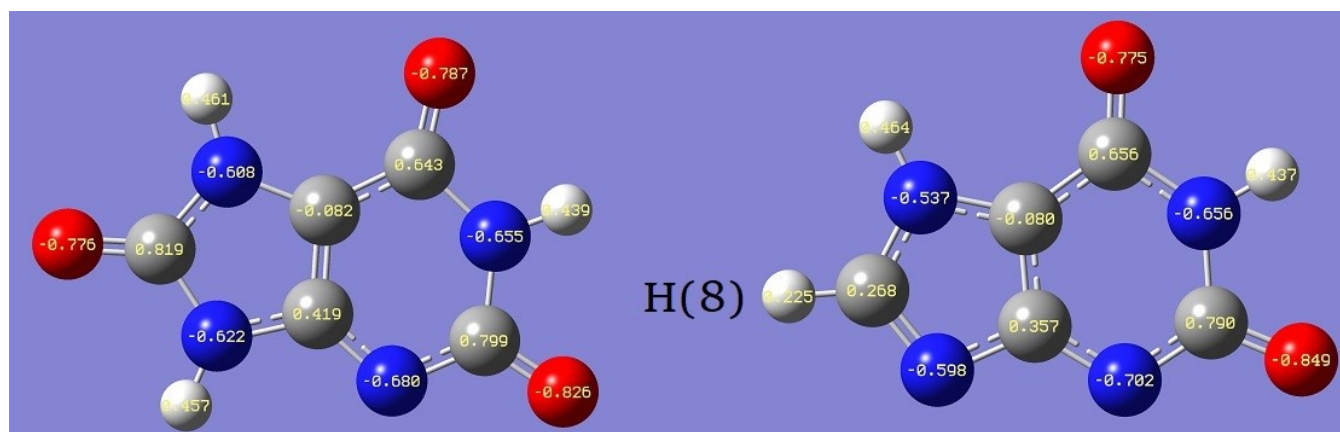

**Fig. S3** The urate<sup>-</sup> and xanthine ion of Natural Bond Orbital partial atomic charges. <sup>[1]</sup>

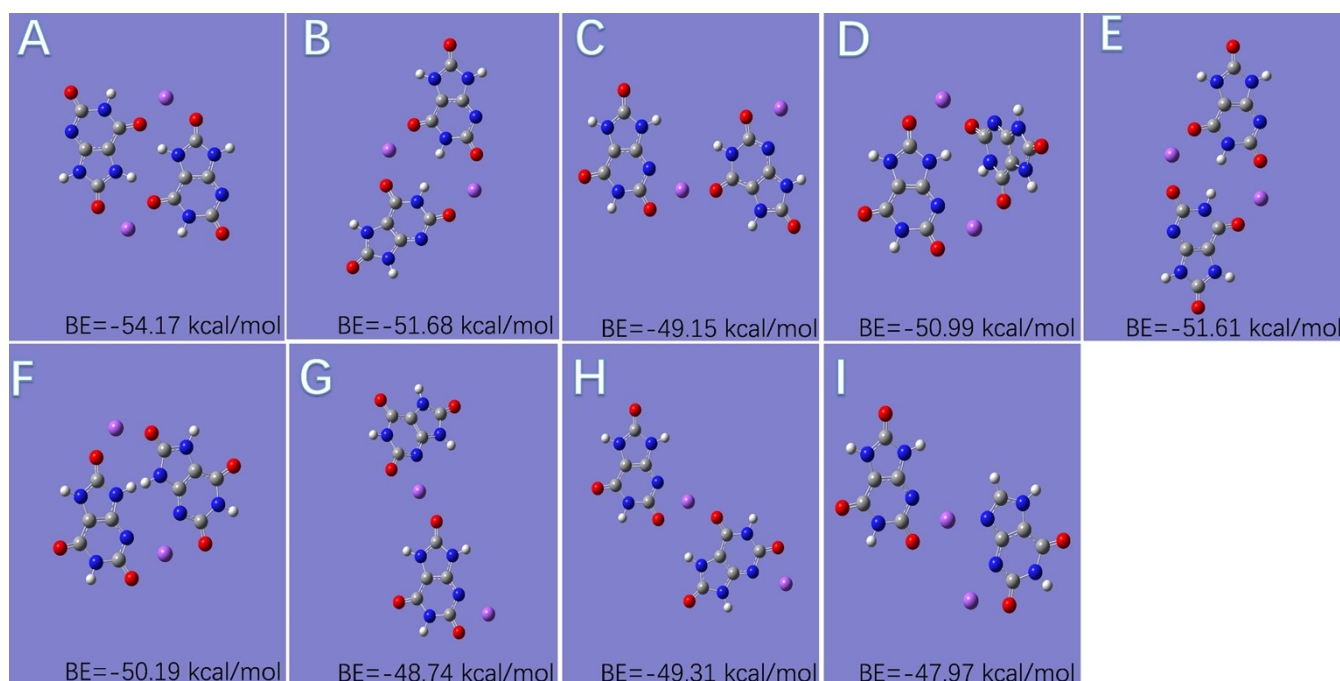

**Figure S4.** Optimized conformations and their binding energies (kcal mol<sup>-1</sup>) of different structures of dimers in solute-solute system in presence of Na ion.

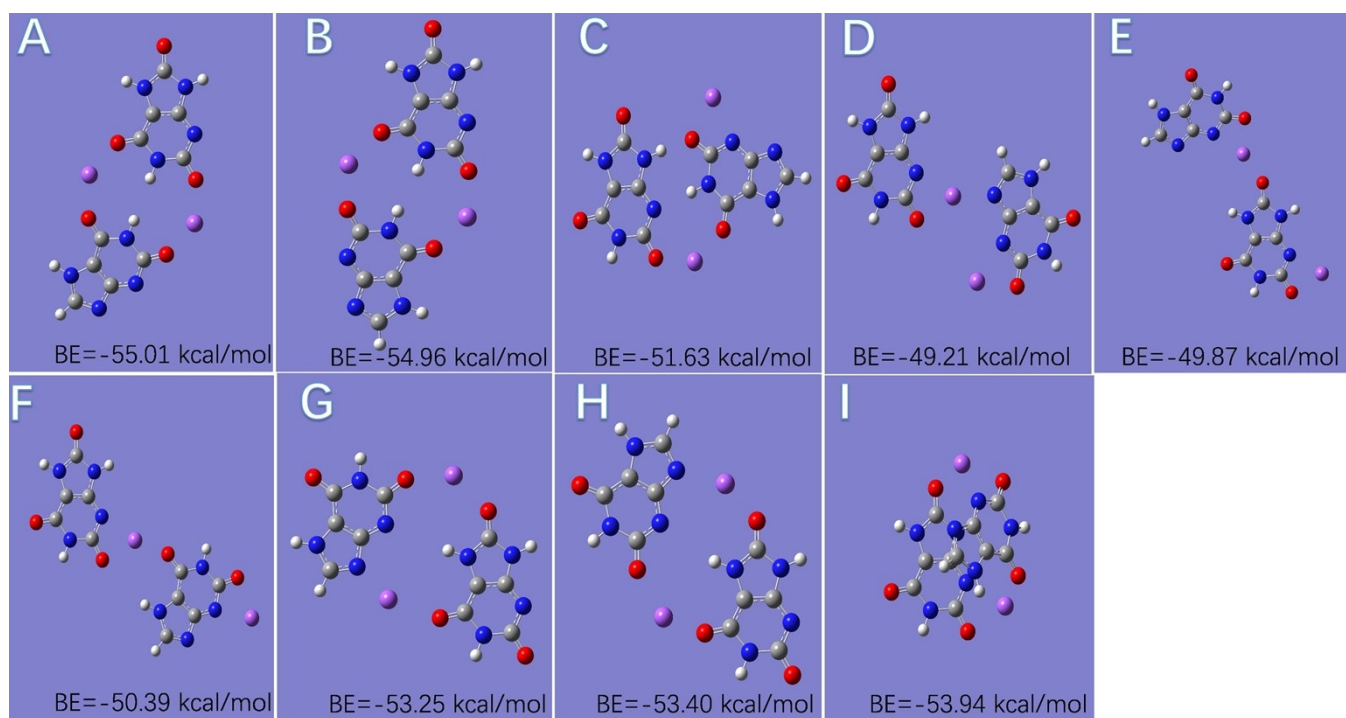

**Figure S5.** Optimized conformations and their binding energies ( $\text{kcal mol}^{-1}$ ) of different structures of dimers in solute-xanthine system in presence of Na ion.

## References

- [1] M. J. Frisch, et al. Gaussian 09, Gaussian Inc., Wallingford, CT, 2009.
